# Supplementary material for: Arhalofenate acid inhibits monosodium urate crystal-induced inflammatory responses through activation of AMP-activated protein kinase (AMPK) signaling
Source: PubMed Central journal article supplement (PMC6127987; doi:10.1186/s13075-018-1699-4), 2018-09-06
Supplement: 13075_2018_1699_MOESM2_ESM.pdf [file 13075_2018_1699_MOESM2_ESM.pdf]

Additional File 2

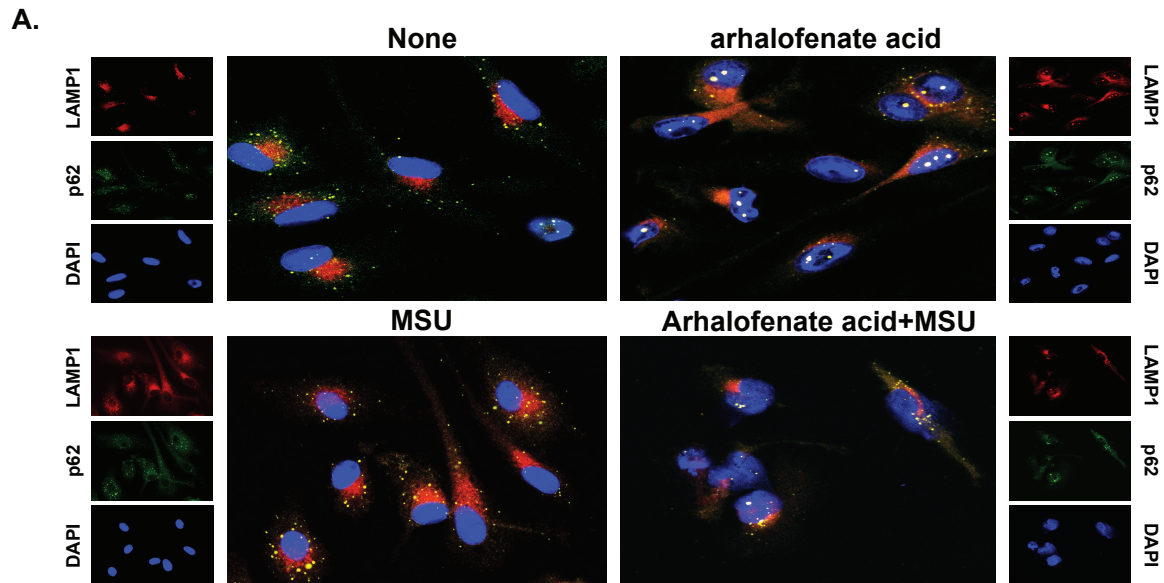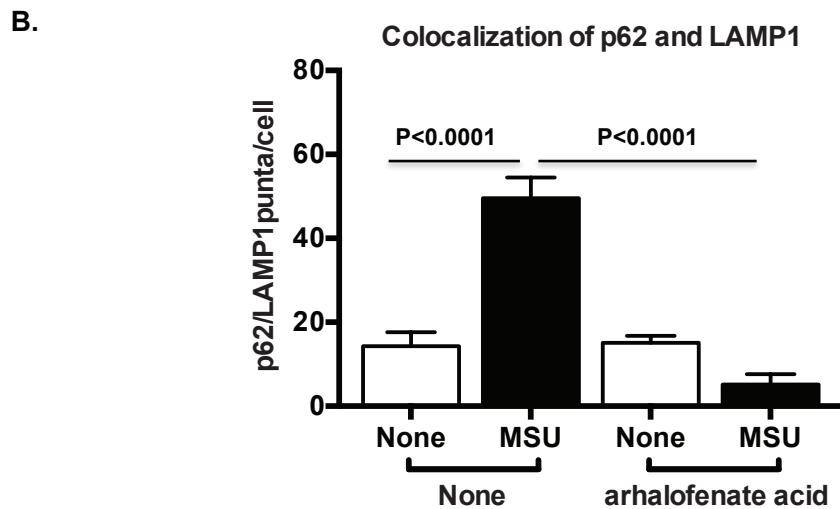

**Additional file 2. Arhalofenate acid promoted autophagy flux.** BMDMs were treated with arhalofenate acid (100  $\mu$ M) for 1 hour before stimulated with MSU crystals (0.2 mg/ml) for 6 hours in RPMI containing 1% FBS. Immunofluorescence microscopy was carried out to visually identify p62 puncta (green) and lysosomes (LAMP1, red) and determine co-localization (yellow) of p62 and LAMP1 (A, 63X). The numbers of yellow punctae per cell were counted and presented in a graph (B). Data shown in A as representative of 3 individual experiments. Data in B as the mean  $\pm$ SD of 200 cells. P values represent comparisons between none and MSU crystals alone, or between MSU crystals alone and MSU crystals plus arhalofenate acid.
