# Supplementary material for: Arhalofenate acid inhibits monosodium urate crystal-induced inflammatory responses through activation of AMP-activated protein kinase (AMPK) signaling
Source: Springer Nature journal article supplement (doi:10.1186/s13075-018-1699-4), 2018-09-06
Supplement: MOESM1 [file 16103570]

Additional file 1

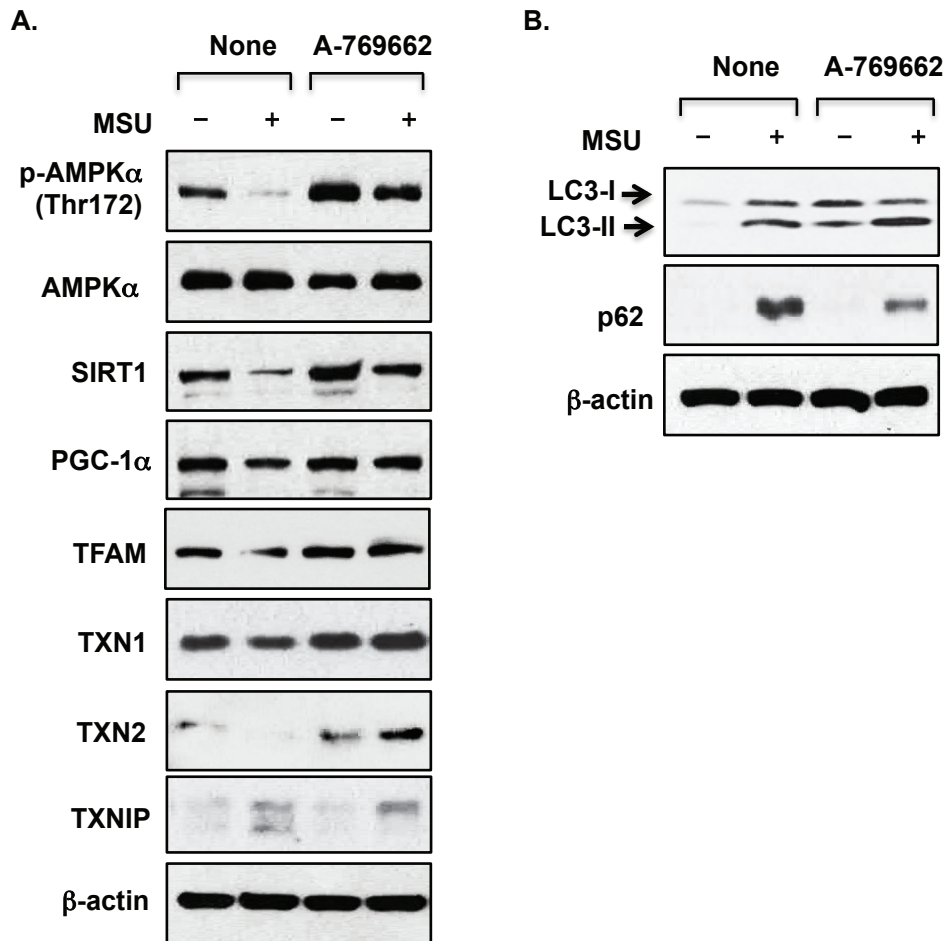

**Additional File 1. A-769662 activated AMPK downstream targets involved in regulation of mitochondrial function.** BMDMs were treated with direct AMPK activator A-769662 (100  $\mu$ M ) for 1 hour before stimulated with MSU crystals (0.2 mg/ml) for 6 or 18 hours in RPMI containing 1% FBS. Western blot analysis was carried out to examine phosphorylation and expression of AMPK $\alpha$ , expression of SIRT1, PGC-1 $\alpha$  and TFAM, and expression of TXN1, TXN2 and TXNIP from 18 hours treatment cells (A), and expression of LC3 and p62 from 6 hours treatment cells (B). Data shown in A and B as representative of 3 individual experiments.
